# Supplementary material for: Cell-to-cell variation and specialization in sugar metabolism in clonal bacterial populations
Source: PLOS journal article supplement (doi:10.1371/journal.pgen.1007122), 2017-12-18
Supplement: S13 (10.1371/journal.pgen.1007122.s013) [file journal.pgen.1007122.s013]

**Table S1.** Maximal isotopic labeling in carbon-limited chemostats, measured after 6.9 volume turnovers, corresponding to 9.96 generations.

| Label                                                                           | *Mean level of maximal labeling    |                                 | **CV in maximal labeling | N cells |
|---------------------------------------------------------------------------------|------------------------------------|---------------------------------|--------------------------|---------|
|                                                                                 | $X^E(^{13}\text{C})_{\text{cell}}$ | $X^E(^2\text{H})_{\text{cell}}$ |                          |         |
| 20 $\mu\text{M}$ $^{13}\text{C}$ -Ara                                           | 0.7074 $\pm$ 0.0101                | /                               | 0.082                    | 33      |
| 20 $\mu\text{M}$ $^2\text{H}$ -Glc                                              | /                                  | 0.1386 $\pm$ 0.0047             | 0.190                    | 32      |
| 10 $\mu\text{M}$ $^{13}\text{C}$ -Ara and 10 $\mu\text{M}$ $^{13}\text{C}$ -Glc | 0.6874 $\pm$ 0.0056                | /                               | 0.087                    | 113     |

\*mean value  $\pm$  standard error of the mean

\*\*CV in  $^{13}\text{C}$  ( $^2\text{H}$ ) excess atom fractions is 8 times (4 times) lower for maximal isotopic labeling than for the measured populations growing in carbon-limited chemostats, which are presented in Fig 1B.
